# Supplementary material
Source: publisher figshare collection journal article supplement (https://gsapubs.figshare.com/ndownloader/files/24624992)
Supplement: Supplementary file 1 [file 24624992]

## Supplemental Material

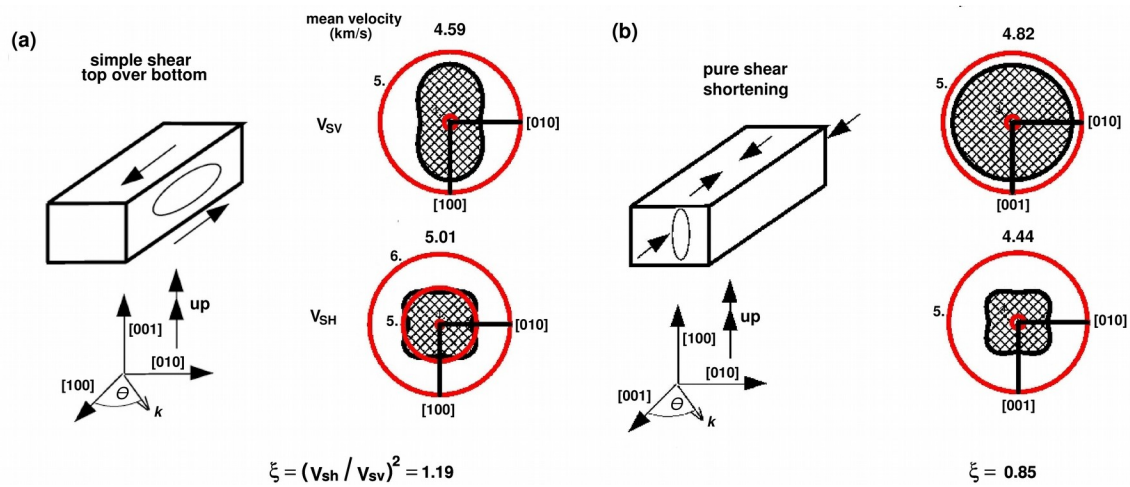

Figure S1: Effect of the deformation mechanism on olivine and the resulting form of radial anisotropy: (a) simple shear and (b) pure shear. When deformation occurs by simple shear (a)  $V_{sh}$  is fast and  $\xi > 1$ . This form of radial anisotropy occurs when, for example, the upper part of the material moves horizontally over the lower part of the material.  $\xi > 1$  is observed at 150 km depth beneath the oceans where the oceanic plate (lithosphere) is moving horizontally over the asthenosphere (Fig. 1D). When deformation occurs by pure shear shortening (b)  $V_{sv}$  is fast and  $\xi < 1$ . This form of radial anisotropy occurs when, for example, material is compressed and thickened.  $\xi < 1$  is observed at 150 km depth beneath the continental cores (Fig. 1D).

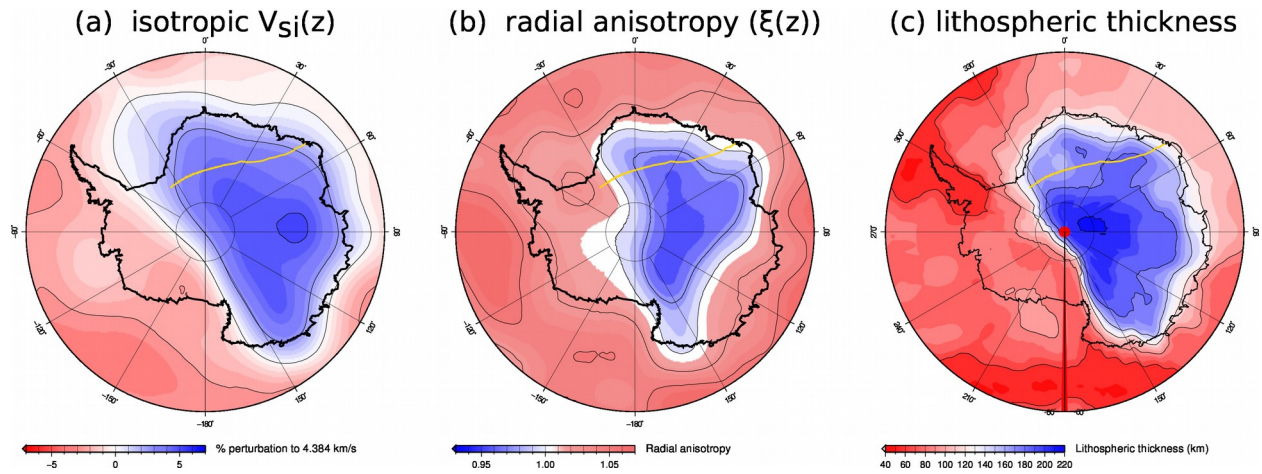

Figure S2: Maps of (a) isotropic shear wave speed ( $V_{si}(z)$ ) at 150 km depth, (b) radial anisotropy ( $\xi$ ) at 150 km depth and (c) lithospheric thickness beneath Antarctica. The figure format is the same as in Figure 2. The yellow contour denotes the geologically-mapped and inferred boundary of the Antarctica craton (Goodwin, 1996).

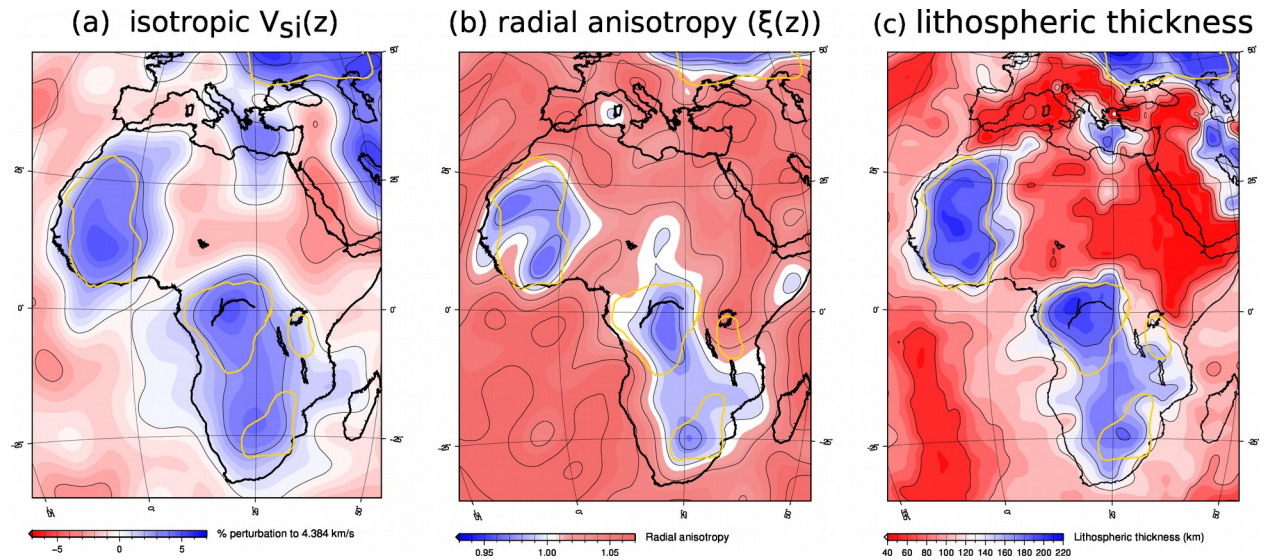

Figure S3: Maps of (a) isotropic shear wave speed ( $V_{si}(z)$ ) at 150 km depth, (b) radial anisotropy ( $\xi$ ) at 150 km depth and (c) lithospheric thickness beneath Africa. Figure format the same as for Figure S2.

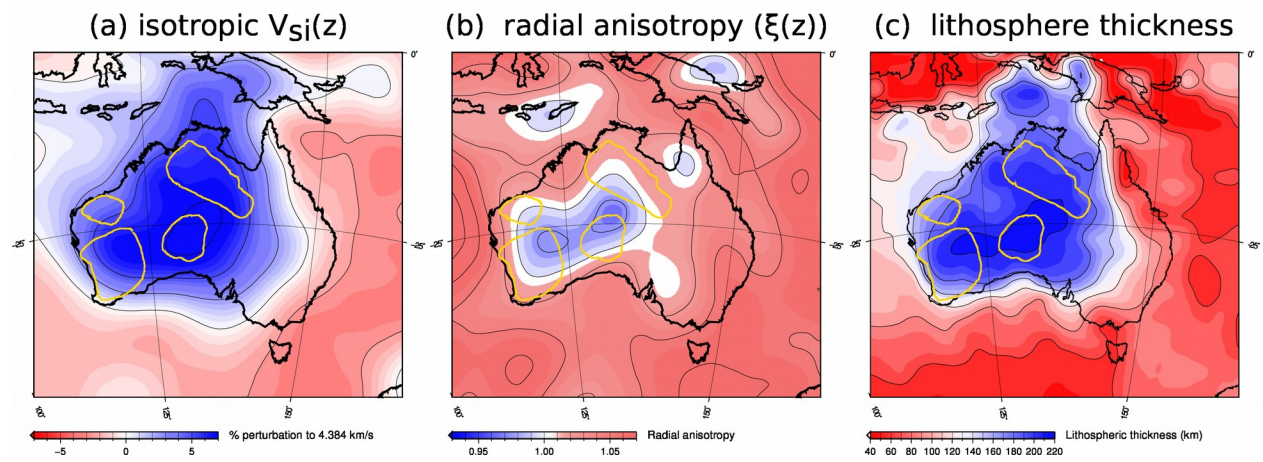

Figure S4: Maps of (a) isotropic shear wave speed ( $V_{si}(z)$ ) at 150 km depth, (b) radial anisotropy ( $\xi$ ) at 150 km depth and (c) lithospheric thickness beneath Australia. Figure format the same as for Figure S2.

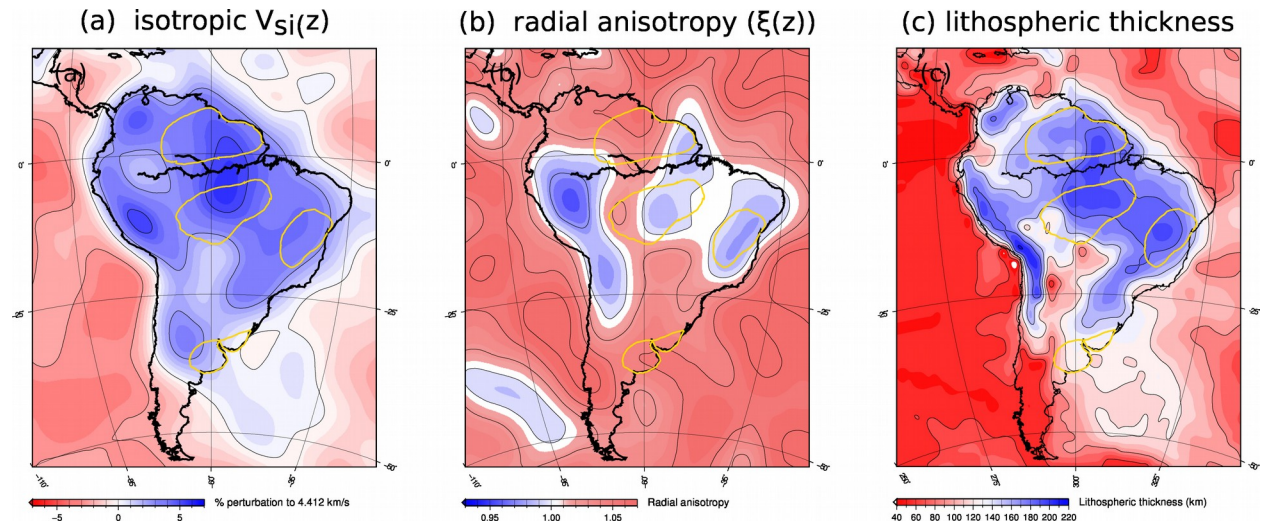



Figure S5: Maps of (a) isotropic shear wave speed ( $V_{si}(z)$ ) at 150 km depth, (b) radial anisotropy ( $\xi$ ) at 150 km depth and (c) lithospheric thickness beneath South America. Figure format the same as for Figure S2.

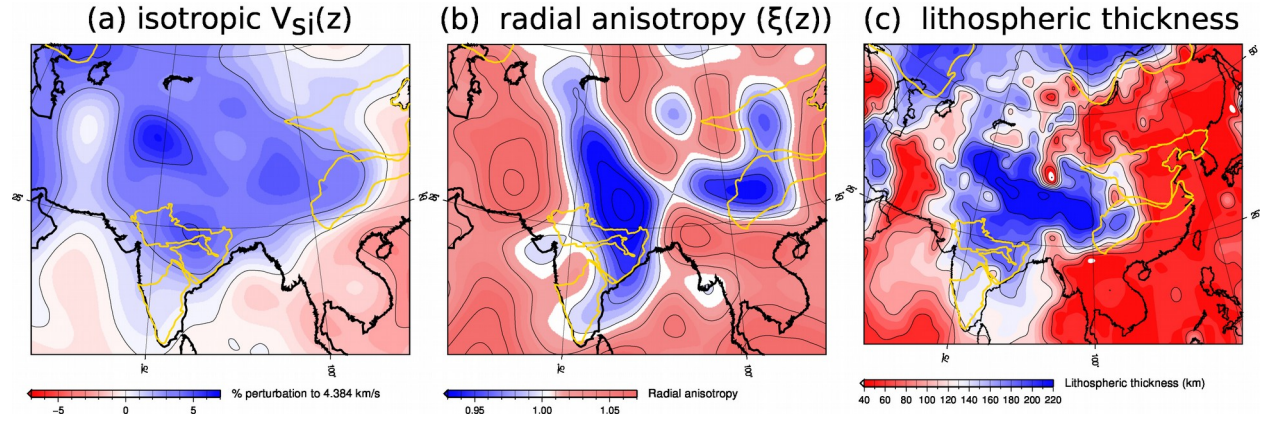

Figure S6: Maps of (a) isotropic shear wave speed ( $V_{si}(z)$ ) at 150 km depth, (b) radial anisotropy ( $\xi$ ) at 150 km depth and (c) lithospheric thickness beneath eastern Eurasia. Figure format the same as for Figure S2.

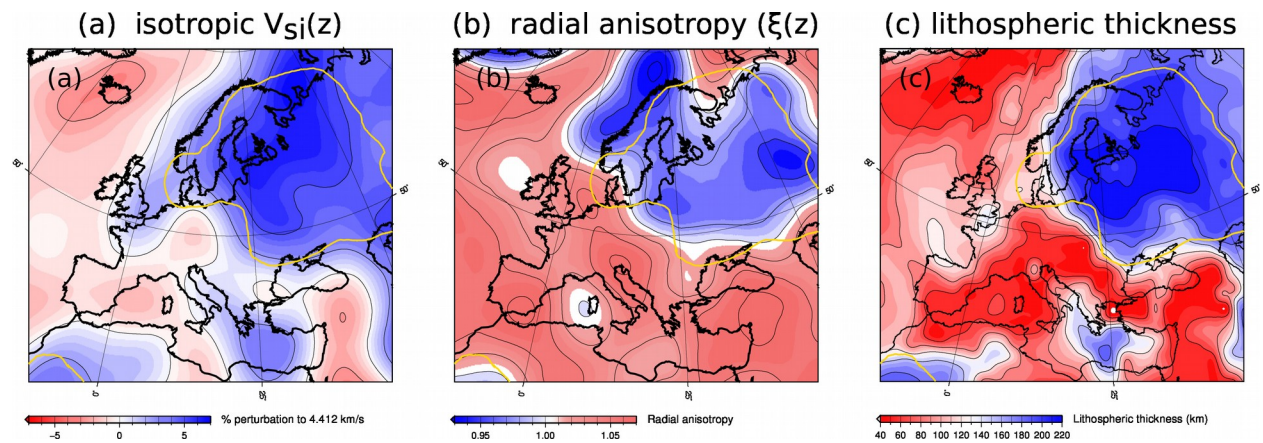

Figure S7: Maps of (a) isotropic shear wave speed ( $V_{si}(z)$ ) at 150 km depth, (b) radial anisotropy ( $\xi$ ) at 150 km depth and (c) lithospheric thickness beneath western Eurasia. Figure format the same as for Figure S2.

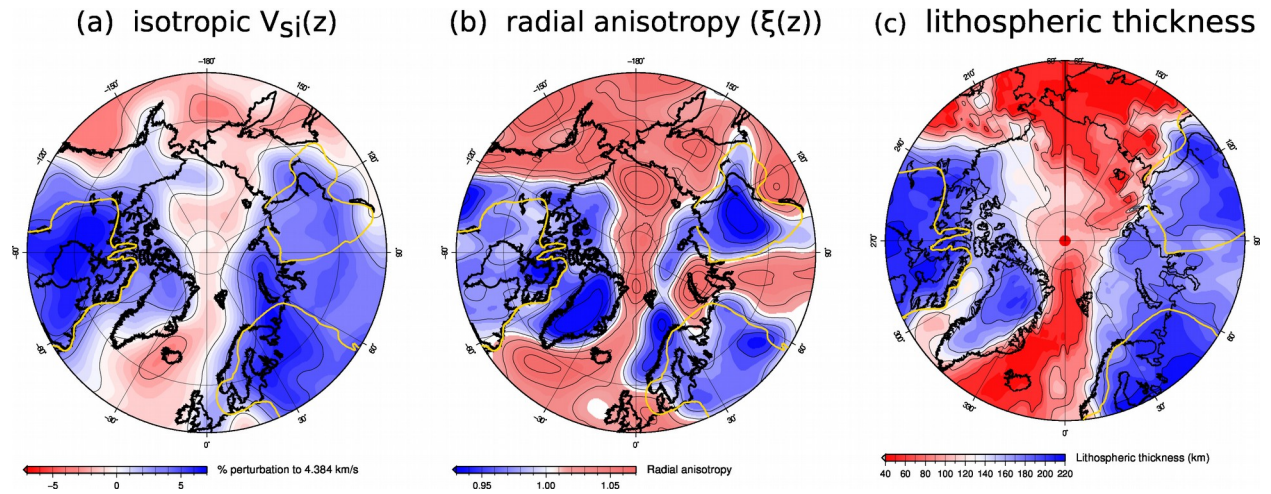

Figure S8: Maps of (a) isotropic shear wave speed ( $V_{si}(z)$ ) at 150 km depth, (b) radial anisotropy ( $\xi$ ) at 150 km depth and (c) lithospheric thickness beneath the Arctic. Figure format the same as for Figure S2.
